# Supplementary material
Source: Royal Society of Chemistry journal article supplement (doi:10.1039/d6cp00898d)
Supplement: d6cp00898d1.pdf [file d6cp00898d1.pdf]

# **Electrochemical Reduction of N-(Arylthio)succinimides: The effect of Aryl Substituents**

Michael A. Saley<sup>1</sup> and Abdelaziz Houmam<sup>1,\*</sup>

<sup>1</sup> Electrochemical Technology Centre, Department of Chemistry, University of Guelph, Guelph, Ontario, Canada N1G 2W1

\* Correspondence: ahoumam@uoguelph.ca

## **Supplementary Information**

**I- Experimental Section**

**II- Synthetic Procedure**

**III- NMR Spectra**

**IV- Supplementary Electrochemical Data**

**V- Computational Results**

## I- Experimental Section

**Cyclic Voltammetry.** Electrochemical measurements were conducted in three electrode glass cells, thermostatted at 25 °C, and under dry nitrogen. The working electrode is a 2 mm diameter glassy carbon electrode (Ekochemie). The electrode was carefully polished and ultrasonically rinsed with ethanol before each run. The reference electrode is a saturated calomel electrode (SCE). The counter electrode was a platinum wire. The electrochemical instrument used is an Autolab PGSTAT30 especially configured to carry high scan rate CV experiments. A feedback correction was applied to minimize the Ohmic drop between the working and reference electrodes.

**Electrolyses.** The electrolyses were carried out in 20 cm<sup>3</sup> cells with a glassy carbon (Electrosynthesis) rectangular plate working electrode of 8 cm<sup>2</sup>. The counter electrode was a platinum grid, separated from the cathodic compartment by means of a glass frit. The reference electrode was the same as for CV. The cell was thermostatted at 25 °C, and the solution was kept under a nitrogen stream during the whole electrolysis. The disappearance of the starting material and the formation of the products were followed by in situ cyclic voltammetry. The supporting electrolyte, tetramethylammonium hexafluorophosphate, was extracted and chromatographic analyses (HPLC and GCMS) were performed by comparison with authentic samples of the product.

**Chemicals.** Acetonitrile (Aldrich), the supporting electrolytes, tetramethylammonium and tetrabutylammonium hexafluorophosphate (Fluka, *puriss*) were used as received. All investigated N-(Arylthio)succinimides (**1a-e**) were synthesised and characterized (see Syhthetic Procedure in Part II below) .

**Theoretical calculation.** Computational investigations were conducted with Gaussian 16<sup>32</sup> using DFT at the B3LYP level and a 6-311G ++ (2d,p) basis set in the solvent phase (acetonitrile) via the PCM. The neutral structures for all compounds **1a-e** were optimized and their energies and molecular orbitals were determined. All potential fragments including substituted phenyl thiyl radicals, their corresponding thiolate anions, the succinimidyl radical and its anion were optimized and their energies were calculated. Frequency determinations for the calculations were performed to check that the obtained conformations were real minima.

## II- Synthetic Procedure

All glassware was dried overnight in an oven at 110 °C, and cooled under an argon atmosphere. To a 100 mL round-bottom flask 0.5 equivalents of disulfide was dissolved in anhydrous dichloromethane, and the solution was cooled to -20 °C under argon. To the round-bottom flask 3 drops of triethylamine was added. A second solution of 1.1 equivalents of sulfuryl chloride dissolved in ~ 5 mL of dichloromethane was prepared and added to the round-bottom flask dropwise, via an addition funnel. An immediate colour change to an orange-red colour occurred upon addition of the sulfuryl chloride solution. The solution was left to mix for 1 hour, where it was then concentrated under vacuum and vacuum distilled to yield the corresponding sulfenyl chloride.

To a second 50 mL round-bottom flask 1.0 equivalent of succinimide and 1.0 equivalent of triethylamine was dissolved in anhydrous acetonitrile. A second solution was prepared from the corresponding sulfenyl chloride, synthesized in the previous step, dissolved in minimal acetonitrile. The second solution was added to the round-bottom flask dropwise, and a pale-yellow precipitate quickly began to form. The solutions were mixed for 1 hour and then the mixture was filtered. The precipitate was washed with cold acetonitrile several times and then recrystallized from acetonitrile prior to electrochemical analysis.

### III- NMR Spectra

#### a) N-(4-methylphenylthio)succinimide (**1a**)

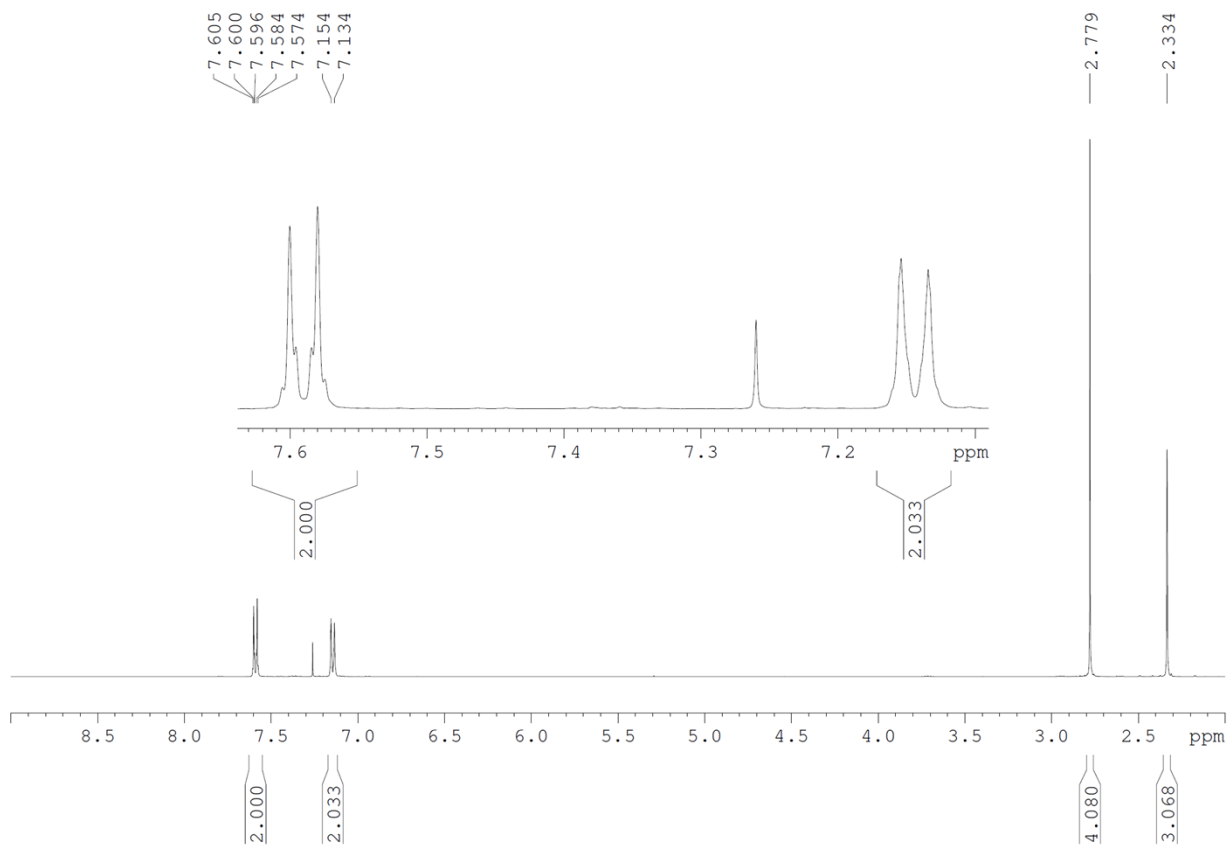

**b) N-(phenylthio)succinimide (1b)**

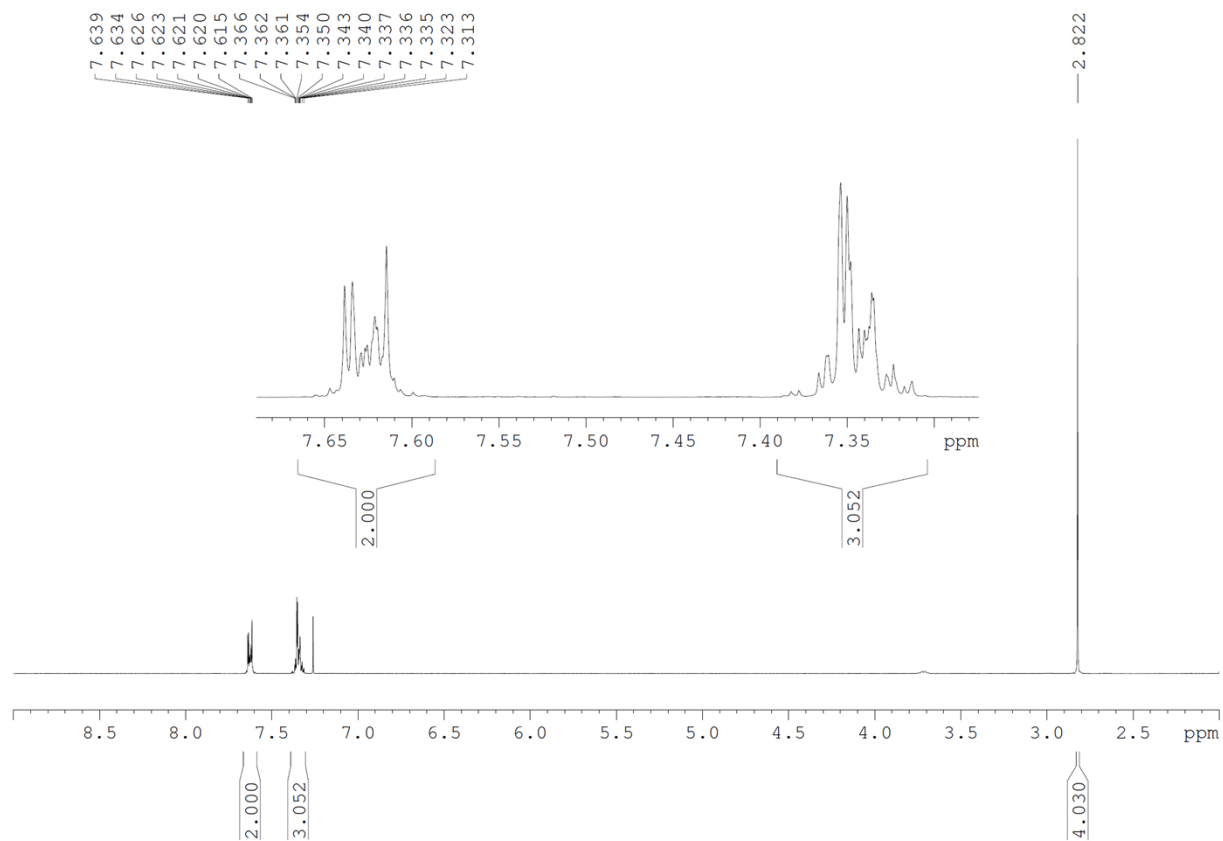

c) N-(4-chlorophenylthio)succinimide (**1c**)

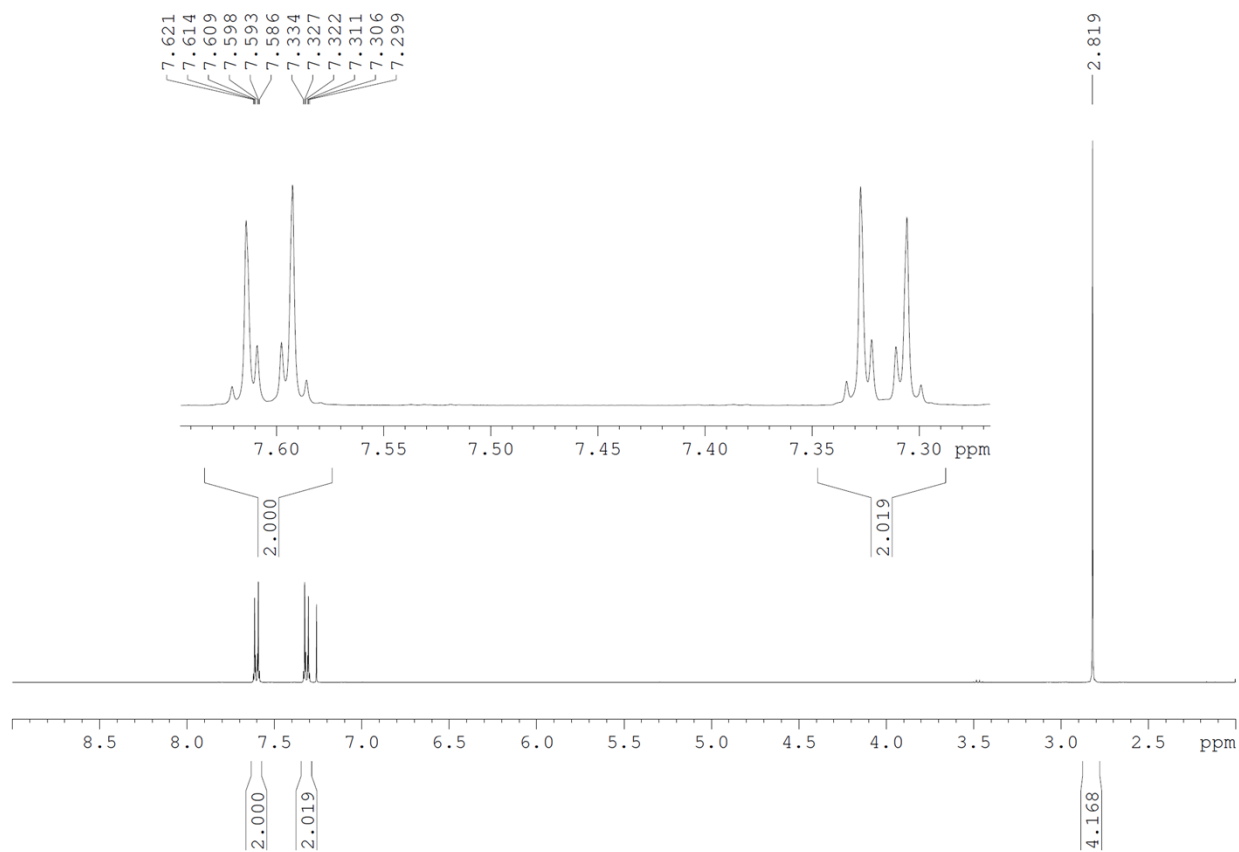

**d) N-(4-bromophenylthio)succinimide (1d)**

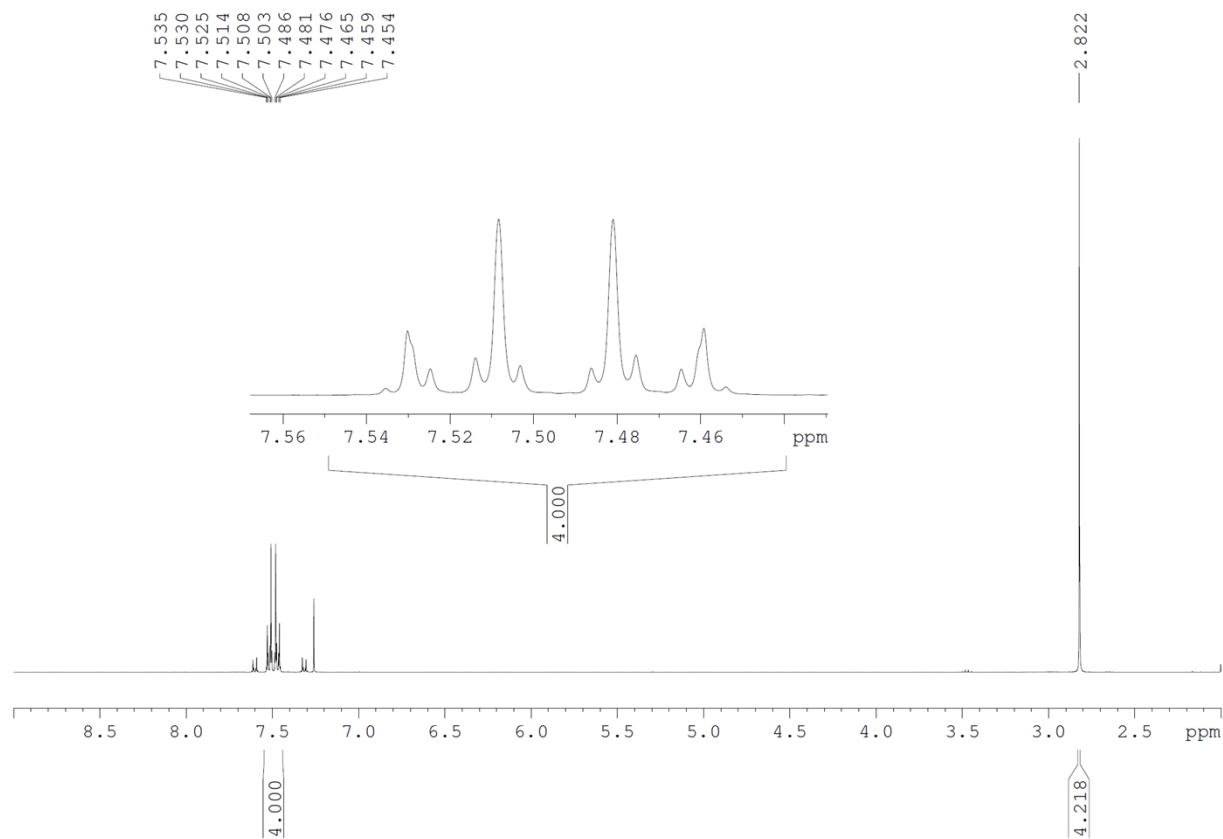

e) N-(4-nitrophenylthio)succinimide (**1e**)

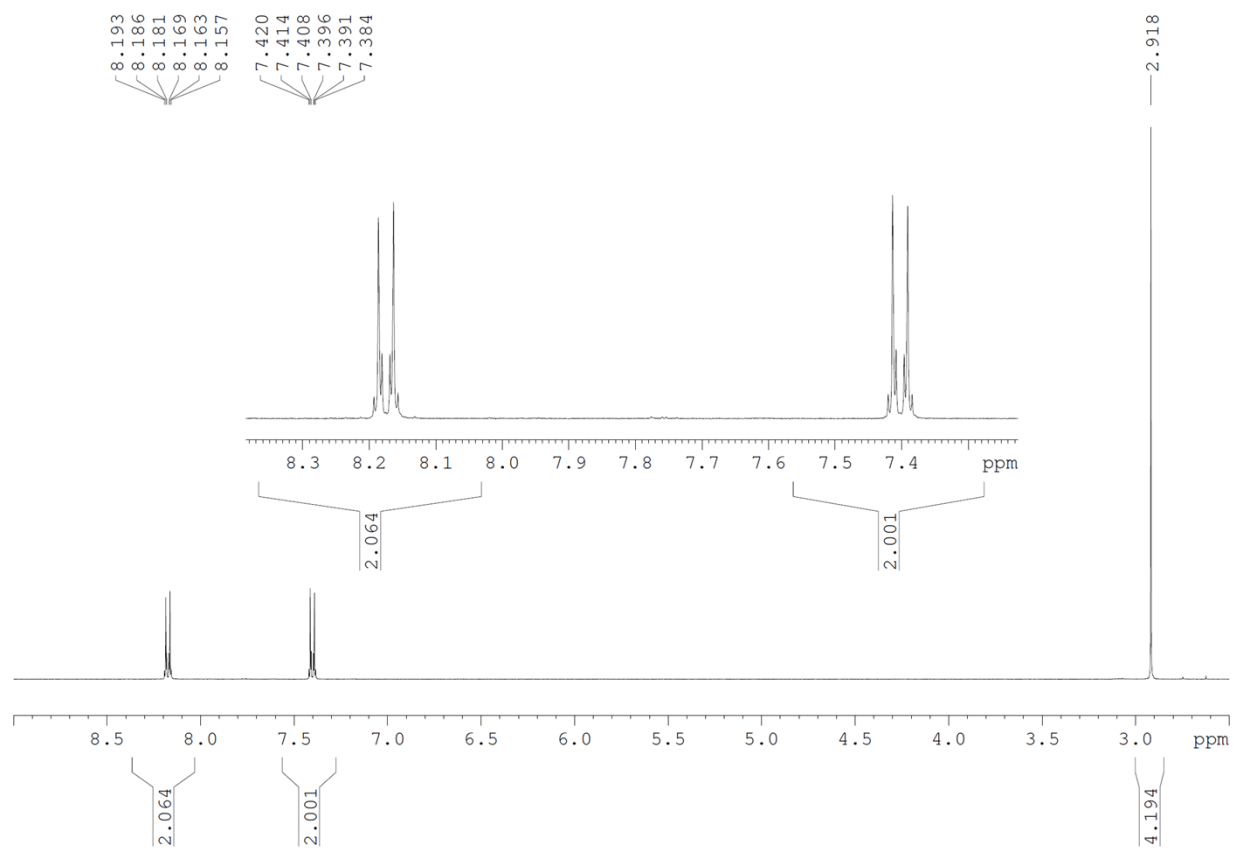

#### IV- Supplementary Electrochemical Data

Cyclic voltammetry of compounds **1b**, **1c** and **1d** and their corresponding disulfides. The data for compound **1a** is provided in the manuscript.

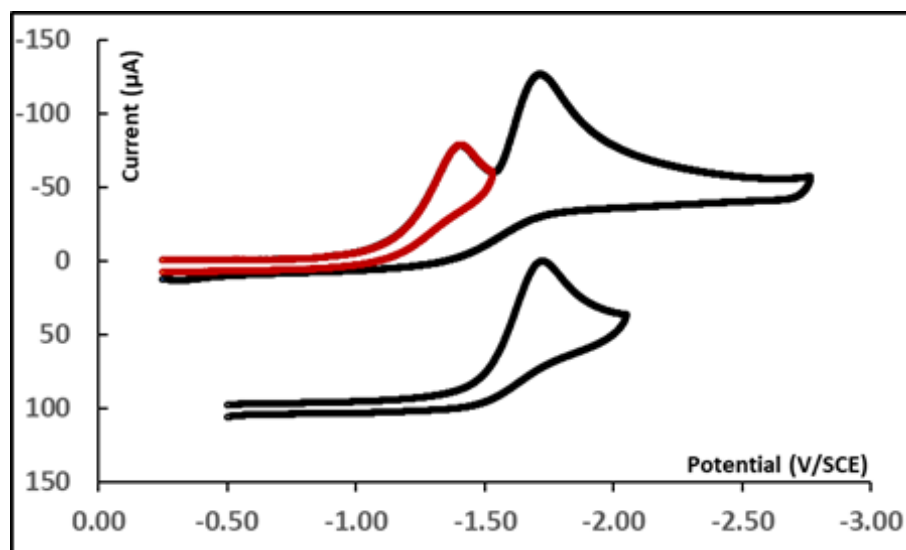

**Figure S1.** Cyclic voltammograms, in acetonitrile in the presence of 0.1 M  $n\text{Bu}_4\text{NPF}_6$  at a scan rate of  $\nu = 0.2 \text{ Vs}^{-1}$  using a glassy carbon electrode, of (Top): N-(phenylthio)succinimide (**1b**, 2.68 mM) and (Bottom): bis(phenyl)disulfide (1.11 mM).

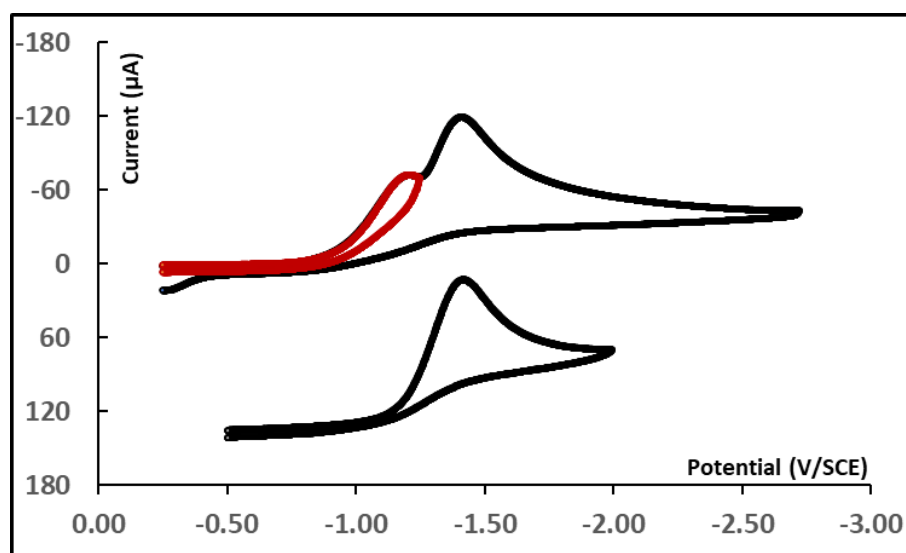

**Figure S2.** Cyclic voltammograms, in acetonitrile in the presence of 0.1 M  $n\text{Bu}_4\text{NPF}_6$  at a scan rate of  $\nu = 0.2 \text{ Vs}^{-1}$  using a glassy carbon electrode, of (Top): N-(4-chlorophenylthio)succinimide (**1c**, 2.66 mM) and (Bottom): bis(4-chlorophenyl)disulfide (1.20 mM).

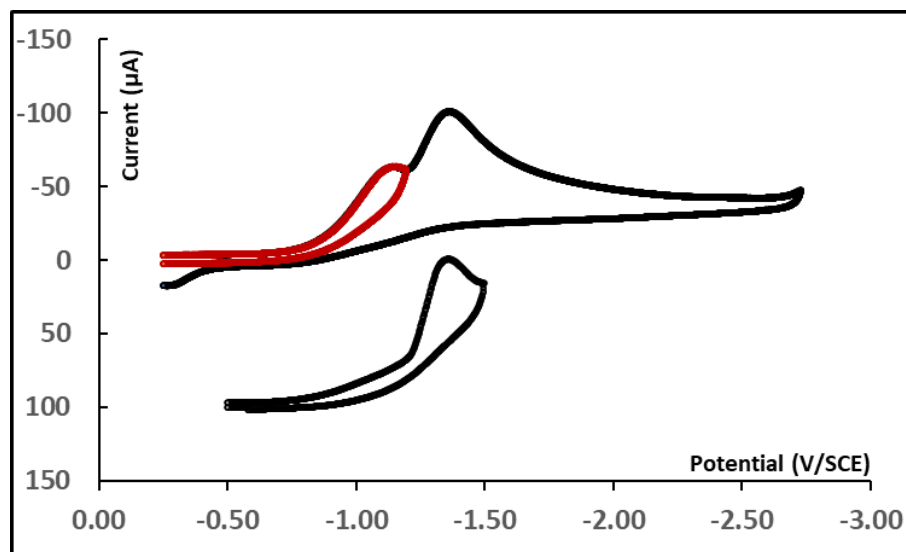

**Figure S3.** Cyclic voltammograms, in acetonitrile in the presence of 0.1 M  $n\text{Bu}_4\text{NPF}_6$  at a scan rate of  $\nu = 0.2 \text{ Vs}^{-1}$  using a glassy carbon electrode, of (Top): N-(4-bromophenylthio)succinimide (**1d**, 2.20 mM) and (Bottom): bis(4-bromophenyl)disulfide (1.18 mM).

$E_p$  vs  $\log \nu$  plots for **1a**, **1b**, and **1e**. For **1c** and **1d**, the first and second peak merge when the scan rate is increased.

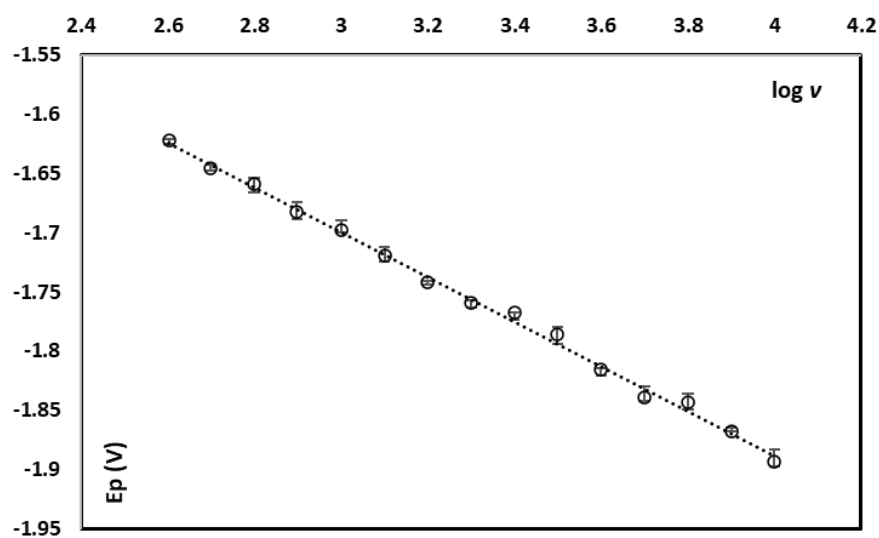

**Figure S4:** Variation of the first reduction peak potential ( $E_{p1}$ ) with  $\log \nu$  for N-(4-methylphenylthio)succinimide (**1a**). Cyclic voltammetry in in acetonitrile in the presence of 0.1 M  $n\text{Bu}_4\text{NPF}_6$ .

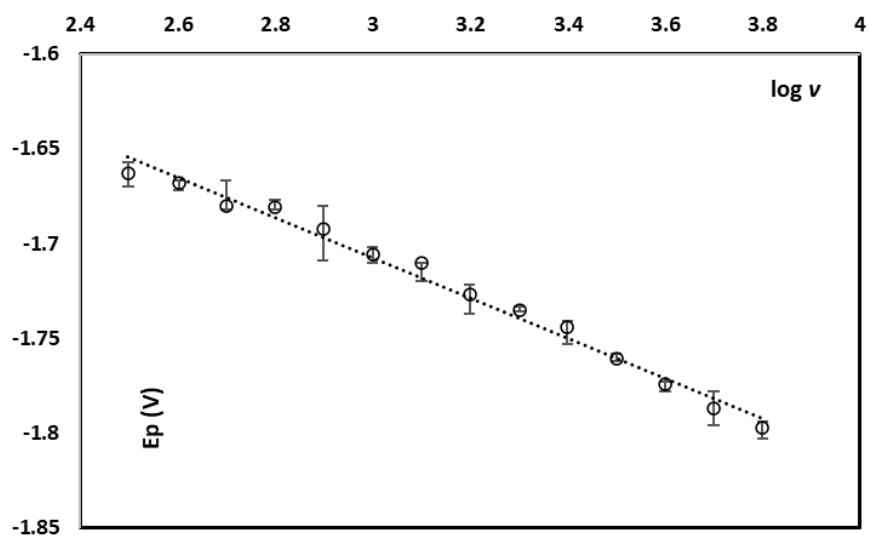

**Figure S5:** Variation of the first reduction peak potential ( $E_{p1}$ ) with  $\log v$  for N-(phenylthio)succinimide (**1b**). Cyclic voltammetry in in acetonitrile in the presence of 0.1 M  $n\text{Bu}_4\text{NPF}_6$ .

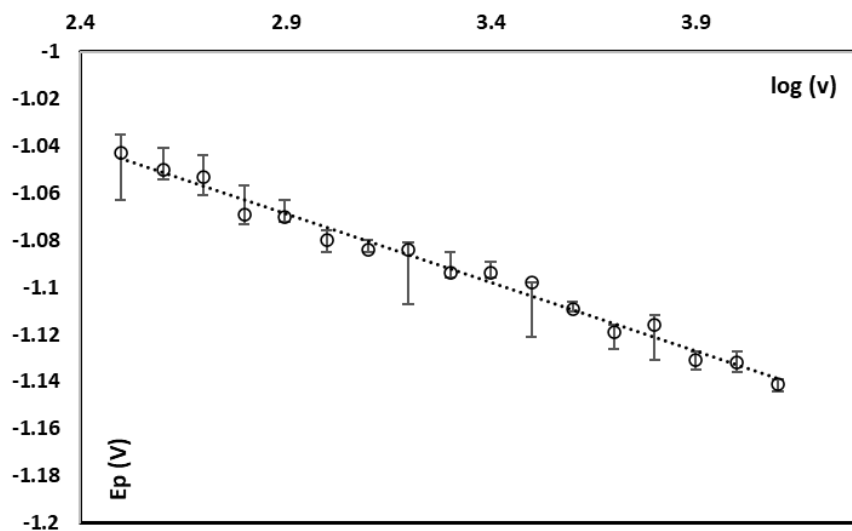

**Figure S6:** Variation of the first reduction peak potential ( $E_{p1}$ ) with  $\log v$  for N-(4-nitrophenylthio)succinimide (**1e**). Cyclic voltammetry in in acetonitrile in the presence of 0.1 M  $n\text{Bu}_4\text{NPF}_6$ .

## V- Computational Results

### N-(4-methylphenylthio)succinimide (1a)

Total Energy: -1029.437612 Hartrees

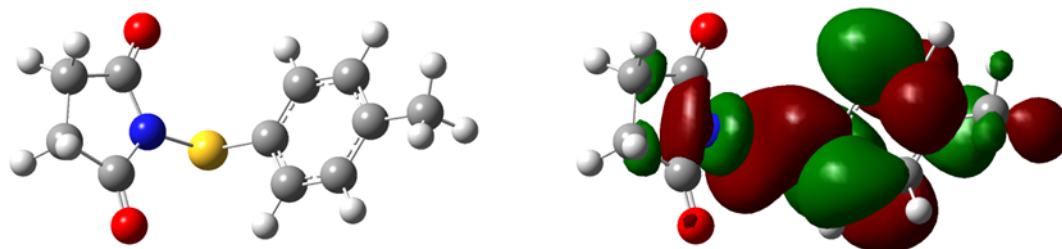

**Figure S7:** Structure and LUMO of **1a**.

| Center Number | Atomic Number | Atomic Type | Coordinates (Angstroms) |           |           |
|---------------|---------------|-------------|-------------------------|-----------|-----------|
|               |               |             | X                       | Y         | Z         |
| 1             | 6             | 0           | 2.264663                | 1.164282  | -0.304164 |
| 2             | 6             | 0           | 2.277244                | -1.175239 | -0.159965 |
| 3             | 7             | 0           | 1.731133                | 0.025923  | 0.325292  |
| 4             | 8             | 0           | 1.949889                | 2.301891  | -0.050998 |
| 5             | 8             | 0           | 1.969602                | -2.276667 | 0.226977  |
| 6             | 6             | 0           | -0.981275               | 0.042483  | 0.765132  |
| 7             | 6             | 0           | -1.558333               | -1.184201 | 0.430689  |
| 8             | 6             | 0           | -1.661642               | 1.226605  | 0.480005  |
| 9             | 6             | 0           | -2.796948               | -1.217813 | -0.196209 |
| 10            | 1             | 0           | -1.035701               | -2.104502 | 0.656690  |
| 11            | 6             | 0           | -2.903672               | 1.179308  | -0.141937 |
| 12            | 1             | 0           | -1.218931               | 2.179132  | 0.740704  |
| 13            | 6             | 0           | -3.491624               | -0.039802 | -0.490200 |
| 14            | 1             | 0           | -3.233217               | -2.175288 | -0.457967 |
| 15            | 1             | 0           | -3.422141               | 2.105736  | -0.361772 |
| 16            | 6             | 0           | 3.276452                | 0.699633  | -1.330985 |
| 17            | 1             | 0           | 4.238836                | 1.158912  | -1.103120 |
| 18            | 1             | 0           | 2.964993                | 1.062288  | -2.311295 |

|    |    |   |           |           |           |
|----|----|---|-----------|-----------|-----------|
| 19 | 6  | 0 | 3.293114  | -0.828766 | -1.228629 |
| 20 | 1  | 0 | 3.007334  | -1.327767 | -2.155087 |
| 21 | 1  | 0 | 4.261672  | -1.229166 | -0.926762 |
| 22 | 16 | 0 | 0.586163  | 0.098637  | 1.626876  |
| 23 | 6  | 0 | -4.849786 | -0.087428 | -1.139526 |
| 24 | 1  | 0 | -5.632978 | -0.209749 | -0.384952 |
| 25 | 1  | 0 | -5.061639 | 0.832576  | -1.685893 |
| 26 | 1  | 0 | -4.929861 | -0.927991 | -1.830699 |

**N-(phenylthio)succinimide (1b)**

Total Energy: -990.108037 Hartrees

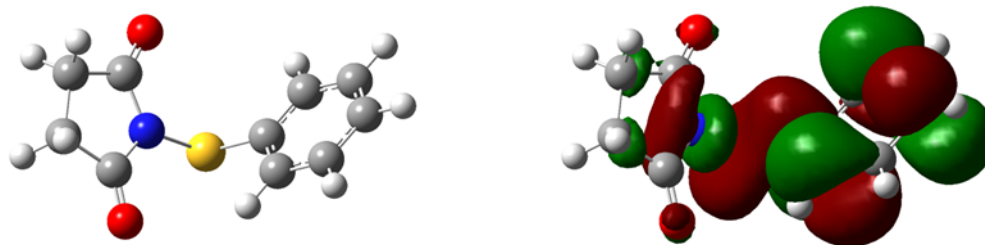

**Figure S8:** Structure and LUMO of **1b**.

| Center Number | Atomic Number | Atomic Type | Coordinates (Angstroms) |           |           |
|---------------|---------------|-------------|-------------------------|-----------|-----------|
|               |               |             | X                       | Y         | Z         |
| 1             | 6             | 0           | 1.834044                | 1.208541  | -0.294785 |
| 2             | 6             | 0           | 2.010445                | -1.108611 | 0.061079  |
| 3             | 7             | 0           | 1.320918                | 0.079401  | 0.375032  |
| 4             | 8             | 0           | 1.404793                | 2.331186  | -0.176592 |
| 5             | 8             | 0           | 1.743164                | -2.198390 | 0.508635  |
| 6             | 6             | 0           | -1.423006               | 0.006791  | 0.513877  |
| 7             | 6             | 0           | -1.766754               | -1.223890 | -0.057274 |
| 8             | 6             | 0           | -2.252065               | 1.119889  | 0.347893  |
| 9             | 6             | 0           | -2.931689               | -1.328780 | -0.813593 |
| 10            | 1             | 0           | -1.128286               | -2.086031 | 0.090444  |
| 11            | 6             | 0           | -3.427384               | 1.000244  | -0.393754 |

|    |    |   |           |           |           |
|----|----|---|-----------|-----------|-----------|
| 12 | 1  | 0 | -1.978414 | 2.068672  | 0.792741  |
| 13 | 6  | 0 | -3.763761 | -0.219743 | -0.978701 |
| 14 | 1  | 0 | -3.196120 | -2.279088 | -1.262811 |
| 15 | 1  | 0 | -4.072260 | 1.862087  | -0.520200 |
| 16 | 6  | 0 | 2.986604  | 0.748318  | -1.164917 |
| 17 | 1  | 0 | 3.879241  | 1.310048  | -0.884400 |
| 18 | 1  | 0 | 2.756746  | 0.996445  | -2.202794 |
| 19 | 6  | 0 | 3.113740  | -0.759958 | -0.917938 |
| 20 | 1  | 0 | 2.980569  | -1.359823 | -1.819723 |
| 21 | 1  | 0 | 4.069978  | -1.043867 | -0.474495 |
| 22 | 1  | 0 | -4.674157 | -0.308575 | -1.560213 |
| 23 | 16 | 0 | 0.040724  | 0.160321  | 1.546785  |

---

### N-(4-chlorophenylthio)succinimide (1c)

Total Energy: -1449.732453 Hartrees

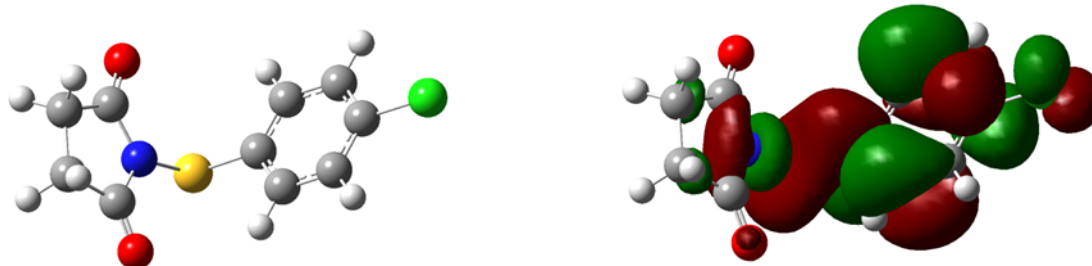

**Figure S9:** Structure and LUMO of 1c.

---

| Center Number | Atomic Number | Atomic Type | Coordinates (Angstroms) |           |           |
|---------------|---------------|-------------|-------------------------|-----------|-----------|
|               |               |             | X                       | Y         | Z         |
| 1             | 6             | 0           | -2.371436               | -1.219184 | -0.043681 |
| 2             | 6             | 0           | -1.100288               | -1.106584 | 0.503561  |
| 3             | 6             | 0           | -0.602306               | 0.146016  | 0.867270  |
| 4             | 6             | 0           | -1.389954               | 1.284592  | 0.701266  |
| 5             | 6             | 0           | -2.671062               | 1.177900  | 0.171338  |
| 6             | 6             | 0           | -3.142987               | -0.073506 | -0.199962 |

---

|    |    |   |           |           |           |
|----|----|---|-----------|-----------|-----------|
| 7  | 1  | 0 | -2.760968 | -2.185793 | -0.332933 |
| 8  | 1  | 0 | -0.496367 | -1.992800 | 0.646416  |
| 9  | 1  | 0 | -1.005548 | 2.255965  | 0.982813  |
| 10 | 1  | 0 | -3.286901 | 2.057577  | 0.042908  |
| 11 | 16 | 0 | 1.010507  | 0.301871  | 1.631153  |
| 12 | 6  | 0 | 3.491145  | 0.549612  | -1.545152 |
| 13 | 6  | 0 | 3.588296  | -0.943689 | -1.215411 |
| 14 | 1  | 0 | 3.106817  | 0.744228  | -2.547084 |
| 15 | 1  | 0 | 4.441448  | 1.076105  | -1.451477 |
| 16 | 1  | 0 | 3.283187  | -1.590002 | -2.038798 |
| 17 | 1  | 0 | 4.589368  | -1.252105 | -0.911306 |
| 18 | 7  | 0 | 2.074182  | 0.074773  | 0.285117  |
| 19 | 6  | 0 | 2.645398  | -1.166030 | -0.051769 |
| 20 | 6  | 0 | 2.518646  | 1.126187  | -0.537957 |
| 21 | 8  | 0 | 2.402891  | -2.207900 | 0.507006  |
| 22 | 8  | 0 | 2.163082  | 2.274529  | -0.434676 |
| 23 | 17 | 0 | -4.757583 | -0.214790 | -0.880027 |

---

### N-(4-bromophenylthio)succinimide (1d)

Total Energy: -3563.646218 Hartrees

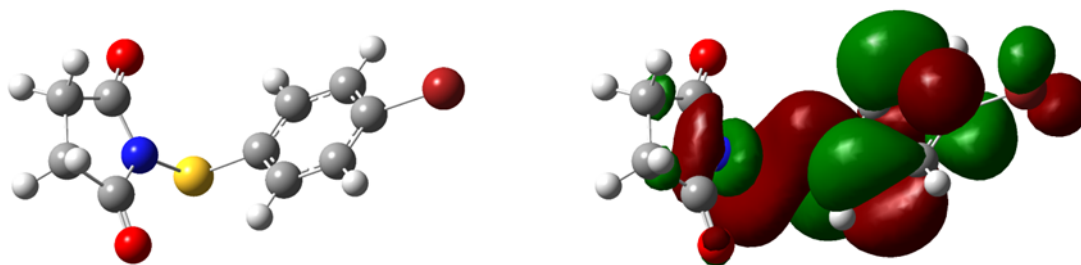

**Figure S10:** Structure and LUMO of **1d**.

---

| Center Number | Atomic Number | Atomic Type | Coordinates (Angstroms) |   |   |
|---------------|---------------|-------------|-------------------------|---|---|
|               |               |             | X                       | Y | Z |

---

|    |    |   |           |           |           |
|----|----|---|-----------|-----------|-----------|
| 1  | 6  | 0 | 1.711058  | -1.129686 | -0.231373 |
| 2  | 6  | 0 | 0.406052  | -0.980754 | -0.683185 |
| 3  | 6  | 0 | -0.099937 | 0.291482  | -0.955255 |
| 4  | 6  | 0 | 0.712053  | 1.413293  | -0.796667 |
| 5  | 6  | 0 | 2.027648  | 1.270111  | -0.366882 |
| 6  | 6  | 0 | 2.507385  | -0.000308 | -0.083326 |
| 7  | 1  | 0 | 2.102067  | -2.113996 | -0.013192 |
| 8  | 1  | 0 | -0.215893 | -1.855110 | -0.822950 |
| 9  | 1  | 0 | 0.321089  | 2.400751  | -1.004113 |
| 10 | 1  | 0 | 2.658204  | 2.140279  | -0.246828 |
| 11 | 16 | 0 | -1.758258 | 0.505146  | -1.598116 |
| 12 | 6  | 0 | -4.040602 | 0.320879  | 1.726318  |
| 13 | 6  | 0 | -4.163068 | -1.116276 | 1.208759  |
| 14 | 1  | 0 | -3.598657 | 0.383240  | 2.721400  |
| 15 | 1  | 0 | -4.992430 | 0.851987  | 1.757366  |
| 16 | 1  | 0 | -3.810466 | -1.863963 | 1.919756  |
| 17 | 1  | 0 | -5.181879 | -1.386665 | 0.928640  |
| 18 | 7  | 0 | -2.735195 | 0.096207  | -0.230702 |
| 19 | 6  | 0 | -3.293207 | -1.179605 | -0.028923 |
| 20 | 6  | 0 | -3.125763 | 1.028384  | 0.749077  |
| 21 | 8  | 0 | -3.090804 | -2.137149 | -0.735036 |
| 22 | 8  | 0 | -2.771586 | 2.181316  | 0.777005  |
| 23 | 35 | 0 | 4.315596  | -0.204879 | 0.525076  |

---

### N-(4-nitrophenylthio)succinimide (1e)

Total Energy: -1194.682041 Hartrees

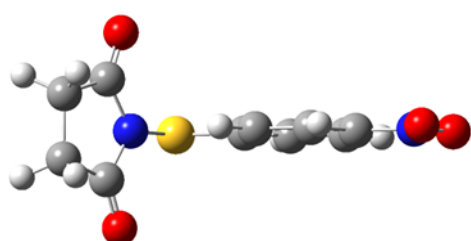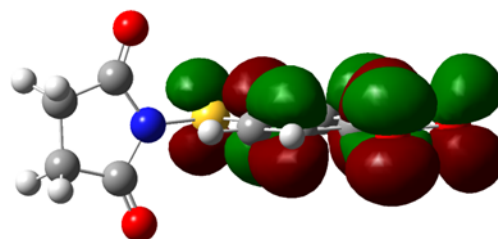

**Figure S11:** Structure and LUMO of **1e**.

| Center Number | Atomic Number | Atomic Type | Coordinates (Angstroms) |           |           |
|---------------|---------------|-------------|-------------------------|-----------|-----------|
|               |               |             | X                       | Y         | Z         |
| 1             | 6             | 0           | -2.861881               | -0.277881 | 1.175371  |
| 2             | 6             | 0           | -2.878983               | -0.210085 | -1.182268 |
| 3             | 7             | 0           | -2.307149               | 0.295797  | 0.008027  |
| 4             | 8             | 0           | -2.538079               | 0.019421  | 2.296328  |
| 5             | 8             | 0           | -2.567598               | 0.147378  | -2.289076 |
| 6             | 6             | 0           | 0.377034                | 0.845629  | 0.016628  |
| 7             | 6             | 0           | 0.590082                | -0.532605 | -0.008517 |
| 8             | 6             | 0           | 1.464573                | 1.728594  | 0.029462  |
| 9             | 6             | 0           | 1.883248                | -1.029015 | -0.019584 |
| 10            | 1             | 0           | -0.239939               | -1.223993 | -0.019344 |
| 11            | 6             | 0           | 2.755575                | 1.236570  | 0.018413  |
| 12            | 1             | 0           | 1.302749                | 2.799342  | 0.048130  |
| 13            | 6             | 0           | 2.953316                | -0.141782 | -0.005655 |
| 14            | 1             | 0           | 2.063243                | -2.093780 | -0.038233 |
| 15            | 1             | 0           | 3.602573                | 1.906435  | 0.028265  |
| 16            | 6             | 0           | -3.890811               | -1.298154 | 0.740655  |
| 17            | 1             | 0           | -4.847929               | -1.037152 | 1.193149  |
| 18            | 1             | 0           | -3.598682               | -2.272455 | 1.134040  |
| 19            | 6             | 0           | -3.910355               | -1.245670 | -0.791559 |
| 20            | 1             | 0           | -3.645237               | -2.194028 | -1.259751 |
| 21            | 1             | 0           | -4.874839               | -0.939213 | -1.198093 |
| 22            | 16            | 0           | -1.223373               | 1.616942  | 0.037369  |
| 23            | 7             | 0           | 4.313731                | -0.666257 | -0.016171 |
| 24            | 8             | 0           | 5.247045                | 0.135387  | -0.003323 |
| 25            | 8             | 0           | 4.468028                | -1.886764 | -0.037270 |

**N-(4-nitrophenylthio)succinimide radical anion ( $1e^-$ )**

Total Energy: -1194.813212 Hartrees

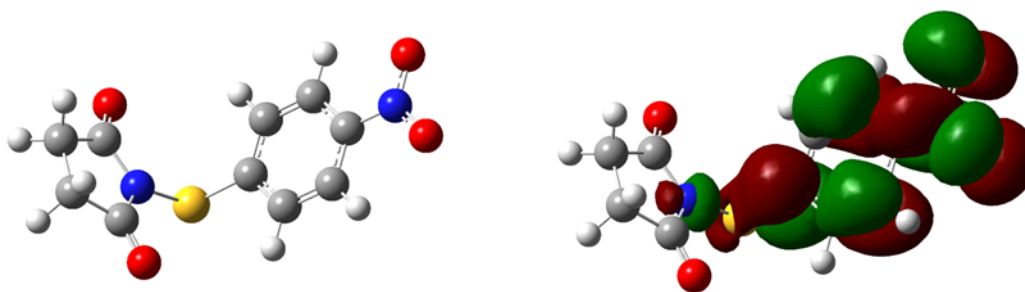

**Figure S12:** Structure and SOMO of  $1e^-$ .

| Center Number | Atomic Number | Atomic Type | Coordinates (Angstroms) |           |           |
|---------------|---------------|-------------|-------------------------|-----------|-----------|
|               |               |             | X                       | Y         | Z         |
| 1             | 6             | 0           | 2.874045                | -1.159021 | 0.280512  |
| 2             | 6             | 0           | 2.791122                | 1.175709  | 0.381676  |
| 3             | 7             | 0           | 2.340749                | 0.016875  | -0.268298 |
| 4             | 8             | 0           | 2.631812                | -2.276818 | -0.109750 |
| 5             | 8             | 0           | 2.473171                | 2.302881  | 0.083874  |
| 6             | 6             | 0           | -0.340586               | 0.015624  | -0.949868 |
| 7             | 6             | 0           | -0.975231               | -1.203199 | -0.651175 |
| 8             | 6             | 0           | -1.035325               | 1.217428  | -0.728165 |
| 9             | 6             | 0           | -2.256425               | -1.226799 | -0.140135 |
| 10            | 1             | 0           | -0.449681               | -2.133774 | -0.824495 |
| 11            | 6             | 0           | -2.319604               | 1.209740  | -0.223441 |
| 12            | 1             | 0           | -0.554744               | 2.160002  | -0.957803 |
| 13            | 6             | 0           | -2.951748               | -0.016587 | 0.081232  |
| 14            | 1             | 0           | -2.745215               | -2.161711 | 0.090053  |
| 15            | 1             | 0           | -2.855666               | 2.131864  | -0.055382 |
| 16            | 6             | 0           | 3.788455                | -0.771741 | 1.425709  |
| 17            | 1             | 0           | 4.789007                | -1.149995 | 1.212555  |
| 18            | 1             | 0           | 3.438436                | -1.265735 | 2.332655  |
| 19            | 6             | 0           | 3.722977                | 0.756455  | 1.501082  |
| 20            | 1             | 0           | 3.317351                | 1.124119  | 2.444450  |
| 21            | 1             | 0           | 4.688841                | 1.239547  | 1.350075  |
| 22            | 16            | 0           | 1.280158                | 0.038238  | -1.663678 |

|    |   |   |           |           |          |
|----|---|---|-----------|-----------|----------|
| 23 | 7 | 0 | -4.245904 | -0.032698 | 0.588993 |
| 24 | 8 | 0 | -4.803458 | -1.160249 | 0.872435 |
| 25 | 8 | 0 | -4.871629 | 1.080307  | 0.768107 |

---

### Succinimidyl radical

Total Energy: -360.095887 Hartrees

| Center Number | Atomic Number | Atomic Type | Coordinates (Angstroms) |           |           |
|---------------|---------------|-------------|-------------------------|-----------|-----------|
|               |               |             | X                       | Y         | Z         |
| 1             | 6             | 0           | -1.145668               | -0.239989 | 0.024739  |
| 2             | 6             | 0           | 1.145900                | -0.242135 | 0.024872  |
| 3             | 7             | 0           | -0.000905               | -0.995147 | 0.349837  |
| 4             | 8             | 0           | -2.229185               | -0.736394 | -0.181860 |
| 5             | 8             | 0           | 2.228297                | -0.736676 | -0.188803 |
| 6             | 6             | 0           | -0.768443               | 1.234540  | 0.006341  |
| 7             | 1             | 0           | -1.209315               | 1.727065  | 0.873963  |
| 8             | 1             | 0           | -1.195849               | 1.691505  | -0.886532 |
| 9             | 6             | 0           | 0.769758                | 1.233777  | 0.022429  |
| 10            | 1             | 0           | 1.218643                | 1.706533  | -0.851201 |
| 11            | 1             | 0           | 1.190685                | 1.708327  | 0.909932  |

---

### Succinimide anion

Total Energy: -360.324630 Hartrees

| Center Number | Atomic Number | Atomic Type | Coordinates (Angstroms) |           |           |
|---------------|---------------|-------------|-------------------------|-----------|-----------|
|               |               |             | X                       | Y         | Z         |
| 1             | 6             | 0           | -1.109363               | -0.268989 | 0.000100  |
| 2             | 6             | 0           | 1.109487                | -0.268963 | -0.000085 |
| 3             | 7             | 0           | -0.000014               | -1.052420 | 0.000684  |
| 4             | 8             | 0           | -2.276231               | -0.683095 | -0.000914 |
| 5             | 8             | 0           | 2.276167                | -0.683128 | 0.000127  |
| 6             | 6             | 0           | -0.762551               | 1.226510  | 0.001075  |
| 7             | 1             | 0           | -1.201222               | 1.699537  | 0.882297  |

|    |   |   |           |          |           |
|----|---|---|-----------|----------|-----------|
| 8  | 1 | 0 | -1.205418 | 1.703408 | -0.875750 |
| 9  | 6 | 0 | 0.762540  | 1.226564 | -0.001197 |
| 10 | 1 | 0 | 1.202061  | 1.700726 | -0.881240 |
| 11 | 1 | 0 | 1.204515  | 1.702321 | 0.876844  |

---

#### 4-Methylphenylthiyl radical

Total Energy: -669.239749 Hartrees

---

| Center<br>Number | Atomic<br>Number | Atomic<br>Type | Coordinates (Angstroms) |           |           |
|------------------|------------------|----------------|-------------------------|-----------|-----------|
|                  |                  |                | X                       | Y         | Z         |
| 1                | 6                | 0              | -1.762502               | 0.000753  | -0.010776 |
| 2                | 6                | 0              | -1.042897               | -1.206190 | -0.010501 |
| 3                | 6                | 0              | 0.336303                | -1.214194 | -0.004102 |
| 4                | 6                | 0              | 1.067962                | 0.000016  | 0.000142  |
| 5                | 6                | 0              | 0.336986                | 1.214370  | -0.004092 |
| 6                | 6                | 0              | -1.042554               | 1.207050  | -0.010485 |
| 7                | 1                | 0              | -1.583307               | -2.145818 | -0.017443 |
| 8                | 1                | 0              | 0.878502                | -2.150899 | -0.005197 |
| 9                | 1                | 0              | 0.879553                | 2.150859  | -0.005194 |
| 10               | 1                | 0              | -1.582445               | 2.146937  | -0.017393 |
| 11               | 16               | 0              | 2.786887                | -0.000363 | 0.006669  |
| 12               | 6                | 0              | -3.263045               | -0.000171 | 0.012936  |
| 13               | 1                | 0              | -3.668874               | -0.871414 | -0.503082 |
| 14               | 1                | 0              | -3.625093               | -0.036555 | 1.046173  |
| 15               | 1                | 0              | -3.670044               | 0.902899  | -0.443318 |

---

#### 4-Methylphenylthiolate

Total Energy: -669.402790 Hartrees

---

| Center<br>Number | Atomic<br>Number | Atomic<br>Type | Coordinates (Angstroms) |           |           |
|------------------|------------------|----------------|-------------------------|-----------|-----------|
|                  |                  |                | X                       | Y         | Z         |
| 1                | 6                | 0              | 1.795082                | -0.000309 | -0.010795 |

---

|    |    |   |           |           |           |
|----|----|---|-----------|-----------|-----------|
| 2  | 6  | 0 | 1.063375  | 1.190640  | -0.010927 |
| 3  | 6  | 0 | -0.327714 | 1.194034  | -0.004610 |
| 4  | 6  | 0 | -1.072225 | -0.000298 | 0.000384  |
| 5  | 6  | 0 | -0.327932 | -1.194380 | -0.004577 |
| 6  | 6  | 0 | 1.063447  | -1.190930 | -0.010941 |
| 7  | 1  | 0 | 1.591223  | 2.140033  | -0.018305 |
| 8  | 1  | 0 | -0.854971 | 2.141513  | -0.007734 |
| 9  | 1  | 0 | -0.855126 | -2.141902 | -0.007600 |
| 10 | 1  | 0 | 1.591383  | -2.140241 | -0.018460 |
| 11 | 16 | 0 | -2.848248 | 0.000266  | 0.007295  |
| 12 | 6  | 0 | 3.303849  | 0.000295  | 0.016692  |
| 13 | 1  | 0 | 3.712600  | 0.866081  | -0.509384 |
| 14 | 1  | 0 | 3.688258  | 0.035877  | 1.042061  |
| 15 | 1  | 0 | 3.711307  | -0.899930 | -0.448657 |

-----

### Phenylthiyl radical

Total Energy: -629.892823 Hartrees

| Center<br>Number | Atomic<br>Number | Atomic<br>Type | Coordinates (Angstroms) |           |           |
|------------------|------------------|----------------|-------------------------|-----------|-----------|
|                  |                  |                | X                       | Y         | Z         |
| 1                | 6                | 0              | -2.242895               | -0.000008 | -0.000102 |
| 2                | 6                | 0              | -1.540182               | -1.201571 | -0.000073 |
| 3                | 6                | 0              | -0.149339               | -1.210679 | -0.000007 |
| 4                | 6                | 0              | 0.552191                | 0.000009  | 0.000023  |
| 5                | 6                | 0              | -0.149351               | 1.210688  | -0.000009 |
| 6                | 6                | 0              | -1.540196               | 1.201562  | -0.000068 |
| 7                | 1                | 0              | -3.325696               | -0.000012 | -0.000151 |
| 8                | 1                | 0              | -2.073608               | -2.144808 | -0.000097 |
| 9                | 1                | 0              | 0.384316                | -2.153065 | 0.000018  |
| 10               | 1                | 0              | 0.384293                | 2.153079  | 0.000014  |
| 11               | 1                | 0              | -2.073634               | 2.144793  | -0.000089 |
| 12               | 16               | 0              | 2.320185                | 0.000000  | 0.000107  |

---

## Phenylthiolate

Total Energy: -630.075504 Hartrees

---

| Center<br>Number | Atomic<br>Number | Atomic<br>Type | Coordinates (Angstroms) |           |           |
|------------------|------------------|----------------|-------------------------|-----------|-----------|
|                  |                  |                | X                       | Y         | Z         |
| 1                | 6                | 0              | -2.267717               | 0.000139  | 0.000110  |
| 2                | 6                | 0              | -1.555318               | 1.198630  | -0.000031 |
| 3                | 6                | 0              | -0.164351               | 1.198943  | -0.000060 |
| 4                | 6                | 0              | 0.576082                | -0.000152 | -0.000092 |
| 5                | 6                | 0              | -0.164595               | -1.199097 | -0.000141 |
| 6                | 6                | 0              | -1.555495               | -1.198499 | 0.000051  |
| 7                | 1                | 0              | -3.351222               | 0.000195  | 0.000161  |
| 8                | 1                | 0              | -2.086905               | 2.144613  | -0.000087 |
| 9                | 1                | 0              | 0.368599                | 2.143048  | -0.000087 |
| 10               | 1                | 0              | 0.368204                | -2.143300 | -0.000369 |
| 11               | 1                | 0              | -2.087270               | -2.144380 | 0.000191  |
| 12               | 16               | 0              | 2.348560                | 0.000002  | 0.000073  |

---

## 4-Chlorophenylthiyl radical

Total Energy: -1089.533490 Hartrees

---

| Center<br>Number | Atomic<br>Number | Atomic<br>Type | Coordinates (Angstroms) |           |           |
|------------------|------------------|----------------|-------------------------|-----------|-----------|
|                  |                  |                | X                       | Y         | Z         |
| 1                | 6                | 0              | -1.335847               | 0.000000  | 0.000062  |
| 2                | 6                | 0              | -0.655590               | 1.218690  | 0.000031  |
| 3                | 6                | 0              | 0.724739                | 1.215786  | -0.000033 |
| 4                | 6                | 0              | 1.451998                | 0.000000  | -0.000068 |
| 5                | 6                | 0              | 0.724739                | -1.215786 | -0.000033 |
| 6                | 6                | 0              | -0.655590               | -1.218690 | 0.000030  |
| 7                | 1                | 0              | -1.206529               | 2.149299  | 0.000057  |
| 8                | 1                | 0              | 1.266376                | 2.152268  | -0.000057 |

---

|    |    |   |           |           |           |
|----|----|---|-----------|-----------|-----------|
| 9  | 1  | 0 | 1.266376  | -2.152268 | -0.000059 |
| 10 | 1  | 0 | -1.206529 | -2.149299 | 0.000056  |
| 11 | 16 | 0 | 3.171784  | 0.000000  | -0.000147 |
| 12 | 17 | 0 | -3.082056 | 0.000000  | 0.000142  |

---

#### 4-Chlorophenylthiolate

Total Energy: -1089.702897 Hartrees

---

| Center<br>Number | Atomic<br>Number | Atomic<br>Type | Coordinates (Angstroms) |           |           |
|------------------|------------------|----------------|-------------------------|-----------|-----------|
|                  |                  |                | X                       | Y         | Z         |
| 1                | 6                | 0              | -1.355240               | 0.000001  | -0.000071 |
| 2                | 6                | 0              | -0.667029               | -1.205645 | -0.000042 |
| 3                | 6                | 0              | 0.722971                | -1.197563 | 0.000018  |
| 4                | 6                | 0              | 1.466050                | -0.000006 | 0.000056  |
| 5                | 6                | 0              | 0.722976                | 1.197555  | 0.000019  |
| 6                | 6                | 0              | -0.667026               | 1.205644  | -0.000045 |
| 7                | 1                | 0              | -1.207100               | -2.144198 | -0.000072 |
| 8                | 1                | 0              | 1.249924                | -2.144274 | 0.000041  |
| 9                | 1                | 0              | 1.249933                | 2.144263  | 0.000027  |
| 10               | 1                | 0              | -1.207095               | 2.144198  | -0.000054 |
| 11               | 16               | 0              | 3.233283                | 0.000003  | 0.000173  |
| 12               | 17               | 0              | -3.126729               | 0.000003  | -0.000137 |

---

#### 4-Bromophenylthiyl radical

Total Energy: -3203.447119 Hartrees

---

| Center<br>Number | Atomic<br>Number | Atomic<br>Type | Coordinates (Angstroms) |           |           |
|------------------|------------------|----------------|-------------------------|-----------|-----------|
|                  |                  |                | X                       | Y         | Z         |
| 1                | 6                | 0              | 0.664952                | 0.000000  | -0.000032 |
| 2                | 6                | 0              | -0.015311               | 1.218120  | 0.000000  |
| 3                | 6                | 0              | -1.396394               | 1.215423  | 0.000065  |
| 4                | 6                | 0              | -2.123540               | 0.000000  | 0.000095  |
| 5                | 6                | 0              | -1.396394               | -1.215423 | 0.000066  |

|    |    |   |           |           |           |
|----|----|---|-----------|-----------|-----------|
| 6  | 6  | 0 | -0.015311 | -1.218120 | 0.000001  |
| 7  | 1  | 0 | 0.530719  | 2.151445  | -0.000024 |
| 8  | 1  | 0 | -1.937397 | 2.152297  | 0.000092  |
| 9  | 1  | 0 | -1.937397 | -2.152297 | 0.000093  |
| 10 | 1  | 0 | 0.530719  | -2.151445 | -0.000024 |
| 11 | 16 | 0 | -3.843624 | 0.000000  | 0.000180  |
| 12 | 35 | 0 | 2.571524  | 0.000000  | -0.000120 |

---

#### 4-Bromophenylthiolate

Total Energy: -3203.617049 Hartrees

| Center Number | Atomic Number | Atomic Type | Coordinates (Angstroms) |           |           |
|---------------|---------------|-------------|-------------------------|-----------|-----------|
|               |               |             | X                       | Y         | Z         |
| 1             | 6             | 0           | -0.675280               | -0.000004 | -0.000022 |
| 2             | 6             | 0           | 0.012740                | -1.205627 | 0.000006  |
| 3             | 6             | 0           | 1.402989                | -1.197354 | 0.000066  |
| 4             | 6             | 0           | 2.146446                | -0.000008 | 0.000122  |
| 5             | 6             | 0           | 1.402992                | 1.197341  | 0.000072  |
| 6             | 6             | 0           | 0.012741                | 1.205619  | 0.000002  |
| 7             | 1             | 0           | -0.522902               | -2.146500 | -0.000025 |
| 8             | 1             | 0           | 1.929387                | -2.144392 | 0.000085  |
| 9             | 1             | 0           | 1.929394                | 2.144376  | 0.000081  |
| 10            | 1             | 0           | -0.522904               | 2.146490  | -0.000018 |
| 11            | 16            | 0           | 3.912801                | 0.000007  | 0.000179  |
| 12            | 35            | 0           | -2.606673               | 0.000003  | -0.000127 |

---

#### 4-Nitrophenylthiyl radical

Total Energy: -834.468658 Hartrees

| Center Number | Atomic Number | Atomic Type | Coordinates (Angstroms) |           |           |
|---------------|---------------|-------------|-------------------------|-----------|-----------|
|               |               |             | X                       | Y         | Z         |
| 1             | 7             | 0           | -2.523727               | 0.000000  | -0.000009 |
| 2             | 8             | 0           | -3.108647               | -1.083929 | -0.000004 |

|    |    |   |           |           |           |
|----|----|---|-----------|-----------|-----------|
| 3  | 8  | 0 | -3.108647 | 1.083929  | -0.000014 |
| 4  | 6  | 0 | -1.069718 | 0.000000  | -0.000001 |
| 5  | 6  | 0 | -0.387702 | 1.213973  | 0.000001  |
| 6  | 6  | 0 | -0.387702 | -1.213973 | -0.000001 |
| 7  | 6  | 0 | 0.994566  | 1.215291  | 0.000005  |
| 8  | 1  | 0 | -0.937578 | 2.143736  | 0.000002  |
| 9  | 6  | 0 | 0.994566  | -1.215291 | 0.000000  |
| 10 | 1  | 0 | -0.937578 | -2.143736 | -0.000003 |
| 11 | 6  | 0 | 1.697927  | 0.000000  | 0.000002  |
| 12 | 1  | 0 | 1.527085  | 2.157135  | 0.000009  |
| 13 | 1  | 0 | 1.527085  | -2.157135 | 0.000001  |
| 14 | 16 | 0 | 3.448363  | 0.000000  | 0.000010  |

#### 4-Nitrophenylthiolate

Total Energy: -834.663506 Hartrees

| Center<br>Number | Atomic<br>Number | Atomic<br>Type | Coordinates (Angstroms) |           |           |
|------------------|------------------|----------------|-------------------------|-----------|-----------|
|                  |                  |                | X                       | Y         | Z         |
| 1                | 7                | 0              | -2.515979               | -0.000001 | 0.000007  |
| 2                | 8                | 0              | -3.120762               | 1.087701  | 0.000001  |
| 3                | 8                | 0              | -3.120783               | -1.087692 | 0.000038  |
| 4                | 6                | 0              | -1.092037               | -0.000005 | -0.000013 |
| 5                | 6                | 0              | -0.390684               | -1.214998 | -0.000016 |
| 6                | 6                | 0              | -0.390693               | 1.214987  | -0.000018 |
| 7                | 6                | 0              | 0.984629                | -1.209063 | -0.000040 |
| 8                | 1                | 0              | -0.939004               | -2.146374 | 0.000016  |
| 9                | 6                | 0              | 0.984623                | 1.209061  | 0.000004  |
| 10               | 1                | 0              | -0.939013               | 2.146364  | -0.000023 |
| 11               | 6                | 0              | 1.732107                | 0.000005  | -0.000059 |
| 12               | 1                | 0              | 1.520467                | -2.149881 | -0.000017 |
| 13               | 1                | 0              | 1.520444                | 2.149889  | 0.000030  |
| 14               | 16               | 0              | 3.463353                | 0.000001  | 0.000031  |
